# Supplementary material
Source: Research Square preprint supplement (doi:10.21203/rs.3.rs-8502955/v1)
Supplement: Supplementary file 1 [file 9c829156f114c0cc7a6c3124.xlsx]

## Sheet: Sheet1
Supplementary Table 1: The list of 80 genes overexpressed in breast tumor tissues compared to normal tissues.
Ensembl ID	Gene Symbol	Gene Description
ENSG00000163993.7	S100P	S100 calcium binding protein P [Source:HGNC Symbol;Acc:HGNC:10504]
ENSG00000275632.1		novel transcript
ENSG00000178776.5	C5orf46	chromosome 5 open reading frame 46 [Source:HGNC Symbol;Acc:HGNC:33768]
ENSG00000183598.4	H3C13	H3 clustered histone 13 [Source:HGNC Symbol;Acc:HGNC:25311]
ENSG00000280120.1		novel transcript
ENSG00000278677.2	H2AC17	H2A clustered histone 17 [Source:HGNC Symbol;Acc:HGNC:4735]
ENSG00000284946.1		novel protein
ENSG00000272825.1		novel transcript
ENSG00000266579.1		novel transcript
ENSG00000254389.3	RHPN1-AS1	RHPN1 antisense RNA 1 (head to head) [Source:HGNC Symbol;Acc:HGNC:28457]
ENSG00000259153.2		novel transcript
ENSG00000253598.3	SLC10A5	solute carrier family 10 member 5 [Source:HGNC Symbol;Acc:HGNC:22981]
ENSG00000211867.1	TRAJ22	T cell receptor alpha joining 22 [Source:HGNC Symbol;Acc:HGNC:12051]
ENSG00000225356.3		epithelial cell adhesion molecule (EPCAM) pseudo
ENSG00000204140.10	CLPSL1	colipase like 1 [Source:HGNC Symbol;Acc:HGNC:21251]
ENSG00000109255.11	NMU	neuromedin U [Source:HGNC Symbol;Acc:HGNC:7859]
ENSG00000266446.1		novel transcript, sense intronic CDKN2B-AS1
ENSG00000212017.2	MIR548U	microRNA 548u [Source:HGNC Symbol;Acc:HGNC:38316]
ENSG00000240204.3	SMKR1	small lysine rich protein 1 [Source:HGNC Symbol;Acc:HGNC:43561]
ENSG00000287377.1		novel transcript, antisense to RFTN1
ENSG00000211866.1	TRAJ23	T cell receptor alpha joining 23 [Source:HGNC Symbol;Acc:HGNC:12052]
ENSG00000266088.6		novel transcript
ENSG00000268686.2		novel transcript, antisense to DKKL1
ENSG00000186007.10	LEMD1	LEM domain containing 1 [Source:HGNC Symbol;Acc:HGNC:18725]
ENSG00000282988.2		novel protein
ENSG00000233030.2		novel transcript, antisense to FCGR1A
ENSG00000261857.7	MIA	MIA SH3 domain containing [Source:HGNC Symbol;Acc:HGNC:7076]
ENSG00000256714.1		novel transcript
ENSG00000279913.1		TEC
ENSG00000287853.1		novel transcript
ENSG00000179934.7	CCR8	C-C motif chemokine receptor 8 [Source:HGNC Symbol;Acc:HGNC:1609]
ENSG00000196754.13	S100A2	S100 calcium binding protein A2 [Source:HGNC Symbol;Acc:HGNC:10492]
ENSG00000286472.1		novel transcript
ENSG00000272079.2		novel transcript
ENSG00000199787.1	SNORA80C	small nucleolar RNA, H/ACA box 80C [Source:HGNC Symbol;Acc:HGNC:50434]
ENSG00000211875.1	TRAJ14	T cell receptor alpha joining 14 [Source:HGNC Symbol;Acc:HGNC:12042]
ENSG00000270276.2	H4C15	H4 clustered histone 15 [Source:HGNC Symbol;Acc:HGNC:29607]
ENSG00000273353.1		novel transcript, sense intronic to NUP50
ENSG00000196844.9	PATE2	prostate and testis expressed 2 [Source:HGNC Symbol;Acc:HGNC:32249]
ENSG00000229422.2		novel transcript
ENSG00000251866.1	SCARNA21B	small Cajal body-specific RNA 21B [Source:HGNC Symbol;Acc:HGNC:52237]
ENSG00000272076.1		novel transcript
ENSG00000170373.9	CST1	cystatin SN [Source:HGNC Symbol;Acc:HGNC:2473]
ENSG00000203811.1	H3C14	H3 clustered histone 14 [Source:HGNC Symbol;Acc:HGNC:20503]
ENSG00000255400.1		novel transcript
ENSG00000265660.1	MIR4664	microRNA 4664 [Source:HGNC Symbol;Acc:HGNC:41777]
ENSG00000230107.1		novel transcript
ENSG00000253535.5		novel transcript
ENSG00000268170.2		novel transcript, antisense to TAS2R40
ENSG00000272563.1		novel transcript
ENSG00000211863.1	TRAJ26	T cell receptor alpha joining 26 [Source:HGNC Symbol;Acc:HGNC:12055]
ENSG00000207274.1	SNORA70I	small nucleolar RNA, H/ACA box 70I [Source:HGNC Symbol;Acc:HGNC:52215]
ENSG00000283172.1	MIR548D1	microRNA 548d-1 [Source:HGNC Symbol;Acc:HGNC:32801]
ENSG00000234997.2		novel transcript
ENSG00000287335.1		novel transcript
ENSG00000285128.1		novel transcript
ENSG00000269919.1		novel transcript, sense intronic to PRDM1
ENSG00000279554.1		novel transcript
ENSG00000237883.2	DGUOK-AS1	DGUOK antisense RNA 1 [Source:HGNC Symbol;Acc:HGNC:43441]
ENSG00000143556.9	S100A7	S100 calcium binding protein A7 [Source:HGNC Symbol;Acc:HGNC:10497]
ENSG00000083782.8	EPYC	epiphycan [Source:HGNC Symbol;Acc:HGNC:3053]
ENSG00000282133.1	TRBJ1-3	T cell receptor beta joining 1-3 [Source:HGNC Symbol;Acc:HGNC:12164]
ENSG00000187475.6	H1-6	H1.6 linker histone, cluster member [Source:HGNC Symbol;Acc:HGNC:4720]
ENSG00000267651.1		novel transcript
ENSG00000207168.1	SNORA15	small nucleolar RNA, H/ACA box 15 [Source:HGNC Symbol;Acc:HGNC:32604]
ENSG00000272264.1		novel transcript
ENSG00000281958.1	TRBJ1-4	T cell receptor beta joining 1-4 [Source:HGNC Symbol;Acc:HGNC:12165]
ENSG00000243179.1		novel transcript
ENSG00000272037.1		novel transcript, antisense to UBR5
ENSG00000286835.1		novel transcript, sense intronic to ZNF367
ENSG00000211873.1	TRAJ16	T cell receptor alpha joining 16 [Source:HGNC Symbol;Acc:HGNC:12044]
ENSG00000233246.1	PHC2-AS1	PHC2 antisense RNA 1 [Source:HGNC Symbol;Acc:HGNC:40205]
ENSG00000211877.1	TRAJ12	T cell receptor alpha joining 12 [Source:HGNC Symbol;Acc:HGNC:12040]
ENSG00000274276.4	CBSL	cystathionine beta-synthase like [Source:HGNC Symbol;Acc:HGNC:51829]
ENSG00000137804.14	NUSAP1	nucleolar and spindle associated protein 1 [Source:HGNC Symbol;Acc:HGNC:18538]
ENSG00000266289.1		novel transcript
ENSG00000273091.1		novel transcript
ENSG00000264188.1		novel transcript
ENSG00000265800.1		novel transcript, sense intronic to HN1
ENSG00000280376.1		novel transcript
